# Supplementary material for: Spacer-length dependence of programmed −1 or −2 ribosomal frameshifting on a U6A heptamer supports a role for messenger RNA (mRNA) tension in frameshifting
Source: PubMed Central journal article supplement — Nucleic Acids Res. 2012 Jun 28;40(17):8674–89. doi: 10.1093/nar/gks629 (PMC3458567; doi:10.1093/nar/gks629), 2012-06-28
Supplement: supp_gks629_nar-01085-a-2012-File010.pdf [file supp_gks629_nar-01085-a-2012-File010.pdf]

## Supplementary Information to:

### Spacer-length dependence of programmed -1 or -2 ribosomal frameshifting on a U<sub>6</sub>A heptamer supports a role for mRNA tension in frameshifting

Zhaoru Lin, Robert J. C. Gilbert\* and Ian Brierley<sup>†</sup>.

Division of Virology, Department of Pathology, University of Cambridge, Tennis Court Road, Cambridge CB2 1QP, United Kingdom. \*Division of Structural Biology, Henry Wellcome Building for Genomic Medicine, University of Oxford, Roosevelt Drive, Oxford OX3 7BN, United Kingdom

#### Supplementary Figure S1

Further characterisation of AON-mediated frameshifting

(A). The two bases immediately 5' of the U<sub>6</sub>A stretch within pFSHIV-AON stopAll were changed as indicated. Also shown are the sequences of four AONs complementary to the mRNA beginning three bases downstream of the U<sub>6</sub>A stretch.

(B). *In vitro* translation of pFSHIV-AON stopAll variants. The wild-type *Nco-I*-derived mRNA (wt) and three sequence variants (pAON AG, CA, CG) were translated in RRL in the absence (H<sub>2</sub>O) or presence of 10μM 25MO, 25OMe, 15OMe or 15RNA. Products were analysed and quantified as in the legend to Figure 1. The frameshifting efficiency measured for each signal (to the nearest integer) is indicated below the relevant lanes (%FS) and takes

into account the number of methionines present in each product (nFS, 19; -1 FS, 10; -2 FS, 11).

### **Supplementary Figure S2**

The effect of slippery sequence -pseudoknot (PK) spacing on -1 and -2 frameshifting on U<sub>6</sub>A.

(A). The spacer of pFSHIV-SRV, which contains the stimulatory RNA pseudoknot of the SRV-1 *gag/pro* signal, was changed from three to nine nucleotides as indicated. A diagrammatic representation of potential translation products of pFSHIV-SRV mRNAs and predicted molecular masses is also shown. The sizes of the encoded frameshift products were normalised by appropriate deletion of bases downstream of the PK.

(B). Messenger RNAs derived from Nco I-cut pFSHIV-SRV spacer variants were translated in RRL and products analysed and quantified as in the legend to Figure 3. The numbers above each gel represent the spacer length. The frameshifting efficiency measured for each signal (to the nearest integer) is indicated below the relevant lanes (-1%FS; -2%FS) and takes into account the number of methionines present in each product (nFS, 10; -1 FS, 10; -2 FS, 11). The asterisk indicates that the line also marks the position of the -1 FS product of pFS cass 5 control mRNA (IBV PK).

### **Supplementary Figure S3**

Mass spectrometry traces.

(A). MALDI mass fingerprint of tryptic digest of -2FS-eGFP-N2 fusion protein.

(B). Peptide coverage of -2FS-eGFP-N2 fusion protein.

(C). Spectrum of the observed  $\gamma$ - and  $\beta$ -ions identified by MS/MS analysis resulting from the fragmentation of the doubly charged 2030pk peptide (panel B).

(D). Table of the observed  $\gamma$ - and  $\beta$ -ions identified by the MS/MS analysis.

# Figure S1

**A**

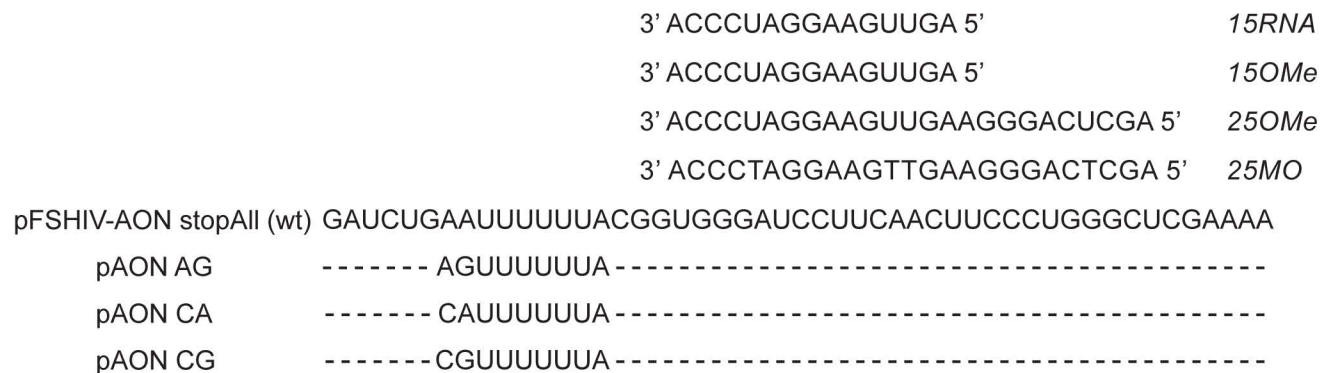

**B**

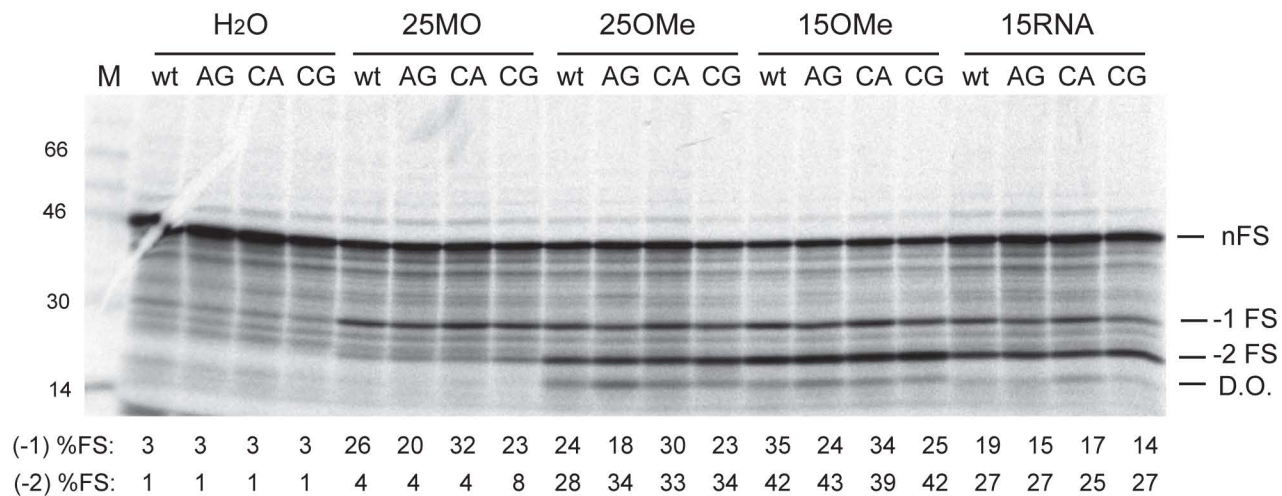

# Figure S2

**A**

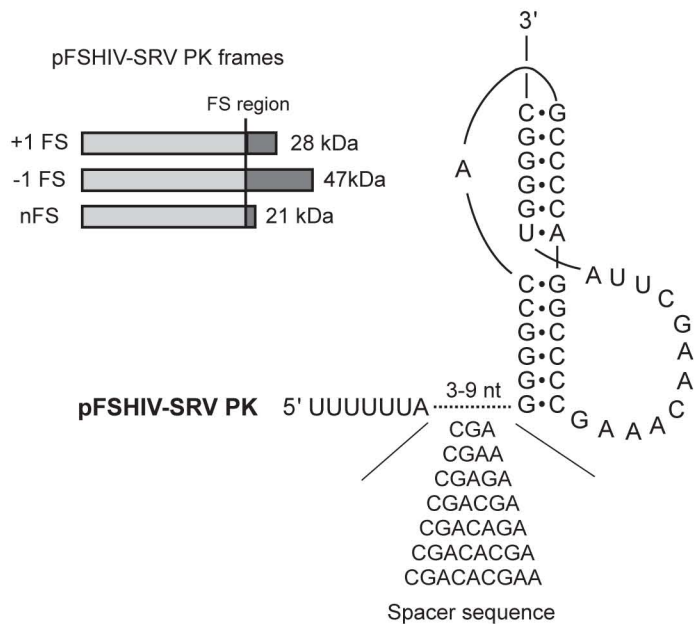

**B**

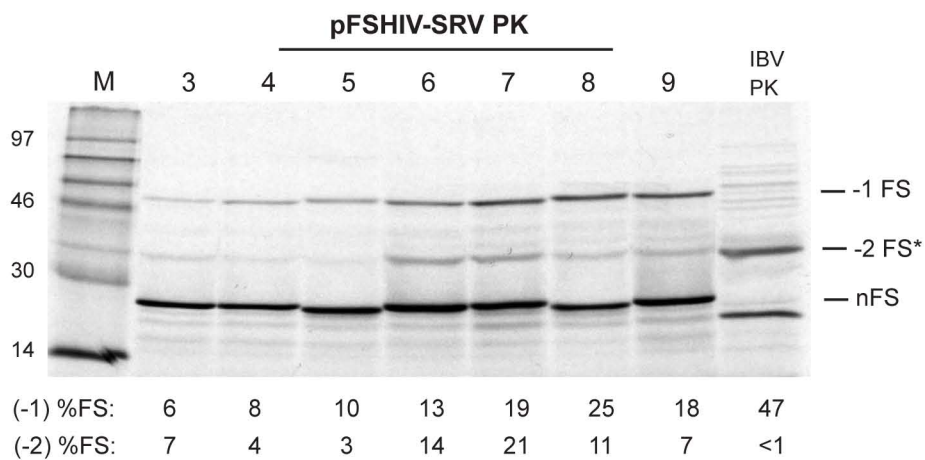

# Figure S3

**A**

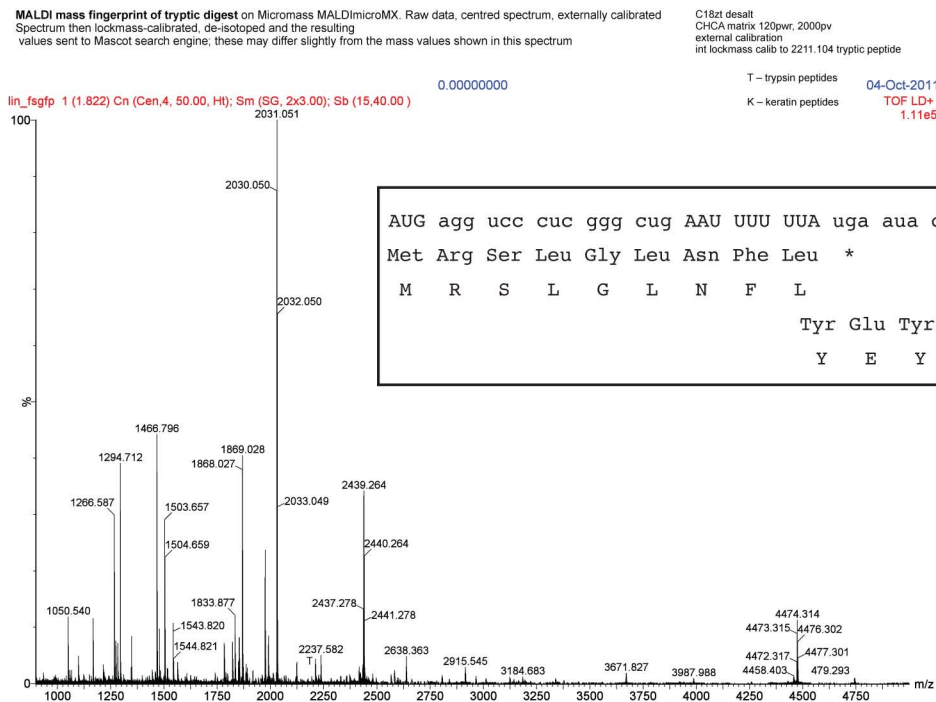

**B**

1 MRSLGLNFLYEYGVSR LGWYPGIHRP VATSVSKGEE LFTGVVPILV ELDGDVNGHK FSVSGEGEGD ATYGKLILLF red = match by mass only

81 ICTIGLEVP NFILVILTY GVQFSRYPD HMKQHDFFKS AMPEGVVQER TIFFKDDGNY KTRAEVKFEG DTLVNRIELL

161 GIDFKEDGNI LGHKLEVNYN SHNVIMADK QKNGIKVNFK IRHNIEDGSV QLADHYQNT PIGDGPVLL DNHYLSTQSA

241 LSKDPNEKRD HMVLLEFVTA AGITLGMDEL YK

The matched peptides cover 77% (210/272AA's) of the protein.

| m/z       | MH <sup>+</sup> | Intensity | Delta ppm | Modifications  | Start | End | Missed Cleavages | Sequence                                         |
|-----------|-----------------|-----------|-----------|----------------|-------|-----|------------------|--------------------------------------------------|
| 804.3860  | 804.3675        | 14000.0   | 23.0      | 1Gln->pyro-Glu | 114   | 119 | 0                | (K)QHDFFK(S)                                     |
| 821.4120  | 821.3941        | 14000.0   | 21.8      |                | 114   | 119 | 0                | (K)QHDFFK(S)                                     |
| 1050.5410 | 1050.5214       | 22030.0   | 18.6      |                | 148   | 156 | 0                | (K)FEGDTLVNR(I)                                  |
| 1266.5891 | 1266.5783       | 66900.0   | 8.52      |                | 120   | 130 | 0                | (K)SAMPEGVVQER(T)                                |
| 1282.5758 | 1282.5732       | 16900.0   | 2.01      | 1Oxidation     | 120   | 130 | 0                | (K)SAMPEGVVQER(T)                                |
| 1347.6638 | 1347.6579       | 18140.0   | 4.35      |                | 131   | 141 | 1                | (R)TIFKDDGNYK(T)                                 |
| 1477.7775 | 1477.7645       | 24810.0   | 8.77      |                | 144   | 156 | 1                | (R)AEVKFEGDTLVNR(I)                              |
| 1503.6611 | 1503.6598       | 74930.0   | 0.869     |                | 61    | 75  | 0                | (K)FVSVEGEGDATYK(L)                              |
| 1542.8223 | 1542.7911       | 31720.0   | 20.2      |                | 161   | 174 | 1                | (K)GIDFKEDGNLGHK(L)                              |
| 1868.0270 | 1868.0177       | 133300.0  | 4.96      |                | 21    | 37  | 0                | (R)LGWYPGIHRPVATSVSK(G)                          |
| 1973.8934 | 1973.9062       | 81590.0   | -6.48     |                | 175   | 190 | 0                | (K)LEYNYNSHNVYIMADK(Q)                           |
| 1989.8812 | 1989.9011       | 30540.0   | -10.0     | 1Oxidation     | 175   | 190 | 0                | (K)LEYNYNSHNVYIMADK(Q)                           |
| 2030.0496 | 2030.0229       | 333000.0  | 13.1      |                | 3     | 20  | 0                | (R)SLGLNFLYEYGVSVPSR(L) ← mass matched           |
| 2437.2780 | 2437.2609       | 120500.0  | 7.00      |                | 38    | 60  | 0                | (K)GEELFTGVVPIVLDGDVNGHK(F)                      |
| 2566.3176 | 2566.2932       | 3174.0    | 9.52      |                | 250   | 272 | 0                | (R)DHMVLLEFVTAAGITLGMDELYK(-)                    |
| 2582.3013 | 2582.2881       | 6546.0    | 5.12      | 1Oxidation     | 250   | 272 | 0                | (R)DHMVLLEFVTAAGITLGMDELYK(-)                    |
| 4472.3110 | 4472.1753       | 54600.0   | 30.3      |                | 203   | 243 | 0                | (R)HNIEDGSVQLADHYQQNTPIGDGPVLLPDNHYLSTQSALS(D)   |
| 4741.5360 | 4741.3605       | 3245.0    | 37.0      |                | 201   | 243 | 1                | (K)IRHNIEDGSVQLADHYQQNTPIGDGPVLLPDNHYLSTQSALS(D) |

**C**

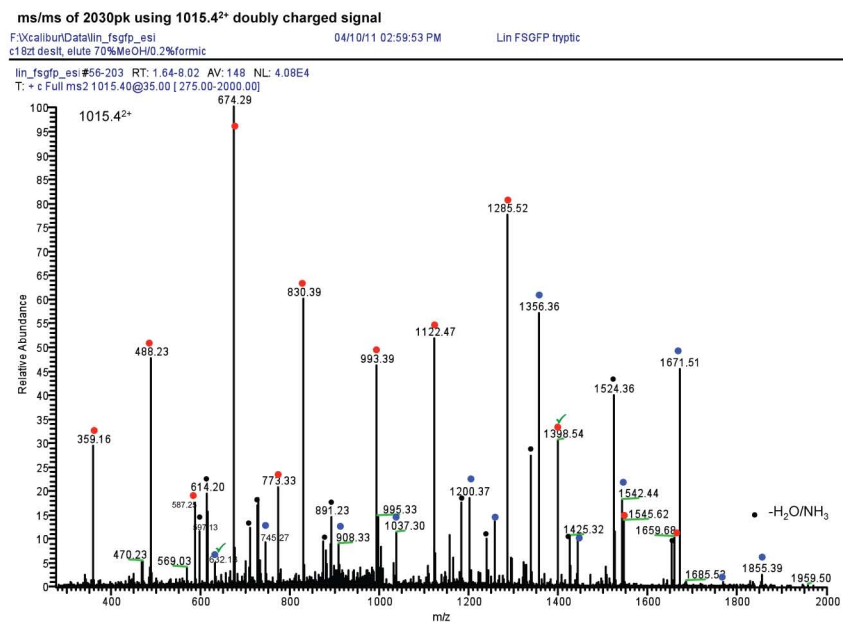

**D**

| b         | y                  |
|-----------|--------------------|
| ---       | 1 S 18 ---         |
| 201.1234  | 2 L 17 1942.9909   |
| 258.1448  | 3 G 16 1829.9068   |
| 371.2289  | 4 L 15 1772.8854   |
| 485.2718  | 5 N 14 1659.8013   |
| 532.3402  | 6 F 13 1545.7584   |
| 745.4243  | 7 L 12 1398.6900 ✓ |
| 908.4876  | 8 Y 11 1285.6059   |
| 1037.5302 | 9 E 10 1122.5426   |
| 1200.5936 | 10 Y 9 993.5000    |
| 1257.6150 | 11 G 8 830.4367    |
| 1356.6834 | 12 V 7 773.4152    |
| 1443.7155 | 13 S 6 674.3468    |
| 1542.7839 | 14 V 5 587.3148    |
| 1671.8265 | 15 E 4 488.2463    |
| 1768.8792 | 16 P 3 359.2037    |
| 1855.9113 | 17 S 2 262.1510    |
| ---       | 18 R 1 175.1190    |
